# Supplementary material for: Responding to preconditioned cues is devaluation sensitive and requires orbitofrontal cortex during cue-cue learning
Source: eLife. 2020 Aug 24;9:e59998. doi: 10.7554/eLife.59998 (PMC7481003; doi:10.7554/eLife.59998)
Supplement: Figure 2—source data 1. [file elife-59998-fig2-data1.xlsx]

## Sheet: figure  2
	Panel A
		YFP	YFP	YFP	YFP	YFP	YFP	YFP	YFP	YFP	YFP	YFP	YFP	YFP	YFP	YFP	YFP	YFP	YFP	YFP	YFP	YFP	YFP
	A	2.21346	2.56984	-4.27476	3.2869	1.70987	20.4438	-10.8629	-4.36667	2.36667	21.8333	1.0355	4.05893	-3.76183	7.36667	0	0	1.96667	0	0	-4.06667	24.4667	8.16667
	B	-3.43333	0.366667	-3.56667	-0.1	-0.0666667	43.1	5.8	-4.36667	11.5	8.66667	3.13333	8.5	2.13333	15.4	0	0.966667	1.53333	0	0	6.1	0.933333	-3.8
	C	-13	-3.1	-15.7333	0	0.366667	3.43333	0	1.73333	6.63333	12.0333	24.4333	-1	7.33333	40.5667	2.83333	2.9	2.5	0	2.36667	12.8	-1.03333	-11.1333
	D	-15.3333	-3.1	-15.7333	5.76667	0.9	34.2	0	6.16667	0.3	-2.53333	-1.26667	-1.66667	1.16667	22.1333	0.833333	17.8333	0	0	4.43333	0.233333	-1.26667	7.13333
		NpHR	NpHR	NpHR	NpHR	NpHR	NpHR	NpHR	NpHR	NpHR	NpHR	NpHR	NpHR	NpHR	NpHR	NpHR	NpHR	NpHR	NpHR	NpHR	NpHR	NpHR
	A	-4.39937	-0.266667	-7.83333	-12.4333	-13.2403	8.27597	0.380009	0.50757	0.829043	-3.85367	4.97702	1.04364	0.304978	9.63333	1.8	-3.36667	2.3	2.2	-1.66667	4.16667	6.3
	B	-9.73333	-1.3	-7.83333	-12.8	-4.86667	-4.33333	0	-2.3	5.3	-6.3	-6.93333	1.6	0.266667	2.86667	-1.76667	-3.36667	6.96667	3.33333	-1.66667	4.76667	10.2333
	C	0.766667	0	-13.2333	5.96667	-12.8333	-15.9	0	-7.9	2	-0.566667	14.2667	0	-0.0666667	15.2333	0	-0.166667	18.0667	8.5	19.8333	0	19.9333
	D	12.4667	1.93333	-13.7667	1.4	-12.5667	-17.6333	0	0.966667	0	-0.566667	1.13333	0.0333333	-1.73333	21.6667	1.03333	-0.166667	0.5	1.23333	0	0	17.1333
	Panel B
	Session	YFP - B	YFP - B	YFP - B	YFP - B	YFP - B	YFP - B	YFP - B	YFP - B	YFP - B	YFP - B	YFP - B	YFP - B	YFP - B	YFP - B	YFP - B	YFP - B	YFP - B	YFP - B	YFP - B	YFP - B	YFP - B	YFP - B
	1	39.6667	29.1333	9	11.8	37.5333	44.7667	23.5333	21.5667	44.4667	64.0333	42.0667	41.7333	42.5333	6.15	4.56667	-0.133333	-1.61667	4.2	-2.35	-7.06667	-4.11667	3.2
	2	35.4	64.6333	35.8667	26.9	47.6333	54.1333	43.8	57	50.1	59.5333	59	39.7	58	41.2667	16.9	9.43333	3.91667	-7.73333	11.05	33.7667	32.65	60.9833
	3	47.4	79.6667	65.7667	52.3	76.3	82.9333	48.5333	70.9667	53.4333	64.8667	66.5667	71.3	27.5	65.75	32.9167	6.75	9.78333	5.3	34.8833	57.95	15.5667	32.5833
	4	63.3	81.8	43.4667	66.3667	72.0667	74.6	65.7667	78.1333	54.5333	34.9	55.8333	83.5667	50.9667	56.7667	63.5833	-1.28333	8.23333	11.9833	31.3833	69.4667	59.6333	11.7833
	5	70.8333	80.6	44.2667	68.3333	78.0667	73.3	63.7333	79.7333	61.4667	53.5	76.0667	83.9333	70.2	78.3667	34.6833	2.71667	21.3167	20.8833	5.86667	39.45	47.2	55.3333
	6	72.9333	71.8	73.3333	81.4	66.5333	79.8	56.4333	87.3667	45.1	47.8	71.5333	85.9333	69.5333	91.8333	39.3667	10.4333	17.6833	44.9833	10.1667	51.0167	50.2833	39.0333
	Session	YFP - D	YFP - D	YFP - D	YFP - D	YFP - D	YFP - D	YFP - D	YFP - D	YFP - D	YFP - D	YFP - D	YFP - D	YFP - D	YFP - D	YFP - D	YFP - D	YFP - D	YFP - D	YFP - D	YFP - D	YFP - D	YFP - D
	1	24.1	11.2333	-6	-0.833333	22.1	35.9667	5.4	16.6667	19.2333	20.8667	29.2667	5.23333	7.26667	2.41667	23.6333	-0.133333	-3.81667	8.46667	-14.35	-5.2	14.2167	8
	2	11.2	2.6	7.66667	36.9	35.9	10.0667	4.83333	25.6	10.4333	31.2	7.1	26.6	28.2	15.4	-1.03333	0.5	5.71667	-3.6	-11.8167	5.03333	-1.68333	39.05
	3	7.16667	5.36667	27.2333	30.6	24.3	43.3	12.6333	22.5	22.4667	32.3667	47.2333	43	19.9	24.15	30.45	0.816667	2.38333	4.03333	23.55	18.95	-3.23333	20.1167
	4	14.5333	27.6667	30.9667	52.3	27.4667	27.5667	28.2667	30.3	28.7333	50.3	39	29.8333	23.0333	42.0333	29.85	4.85	25.6333	12.9167	17.7167	45.9333	34.4333	21.5167
	5	11.6	6.16667	34.9	37.4	31.4667	29.8333	16.5667	18.1	20.0333	40.9667	30.2667	11	22.8	57.5	12.6833	9.45	3.91667	15.6167	1.46667	8.45	14.6	24.5333
	6	18.1667	4.06667	21.6333	46.0333	35.6	20.7	22.8	16.6	63.7667	26.3	41.3333	25.0667	49.4333	59.5667	13.7667	-0.166667	0.0833333	29.1167	-1.63333	11.35	27.4833	-1.1
	Session	NpHR - B	NpHR - B	NpHR - B	NpHR - B	NpHR - B	NpHR - B	NpHR - B	NpHR - B	NpHR - B	NpHR - B	NpHR - B	NpHR - B	NpHR - B	NpHR - B	NpHR - B	NpHR - B	NpHR - B	NpHR - B	NpHR - B	NpHR - B	NpHR - B
	1	54.6333	34.9667	32.9667	13.7667	31.9	37.6667	50.5	25.4333	28.6667	38.5667	46.2333	5.06667	60.4667	-6.75	-17.8	-21.1333	5.96667	-2	14.2833	16.45	27.6333
	2	57.7	58.2	37.1667	57.1	6.93333	59.3333	48.0667	44.8	67.6333	58.2	80.4333	52.1333	64.2	16	18.9333	23.4167	16.7	31.0667	0.55	12.4667	73.8667
	3	65.7667	60.6667	62.2	73.1	26.2667	45.6	56.8333	72.8333	66.3	61.4333	49.4667	66.6	73.8667	15	38.6667	22.9167	14.8333	11.4333	10.85	15.4167	95.4167
	4	75.5	43.0333	65.7	72.9333	75.6	60.4	58.3	84.2	61.5333	65.8	77.4	48.9333	75	32	71.3	36.4167	26.3167	31.5667	15.9333	12.3667	2.83333
	5	82.9	52.3	72.3667	71.9333	67	57.9333	77.4333	73.4667	82.3667	69.8	72.2333	81.2	57.1	32.2167	56.9833	52.9167	53.65	42.2833	26.0667	24.8667	91.15
	6	65.5667	56.5	61.3333	77.9333	68.0333	64.6667	66.6	83.0333	80.7	63.9333	76.5	58.5667	71.4667	43.65	48.2333	34.2667	50.2667	28.0667	8.1	44.1667	62.2833
	Session	NpHR - D	NpHR - D	NpHR - D	NpHR - D	NpHR - D	NpHR - D	NpHR - D	NpHR - D	NpHR - D	NpHR - D	NpHR - D	NpHR - D	NpHR - D	NpHR - D	NpHR - D	NpHR - D	NpHR - D	NpHR - D	NpHR - D	NpHR - D	NpHR - D
	1	12.1333	-9.93333	4.93333	23.2333	-0.533333	13.1	4.06667	-1.86667	22.2667	-0.966667	-1.53333	0.0666667	31.5667	-6.81667	-16.5333	-16.5333	9.5	13.3333	10.0167	52.9167	9.7
	2	8.4	6.86667	10.5667	8.1	-3.63333	24.0333	5.43333	11.9	22.0667	13.2667	15.7	22.4333	41.5	22	19	24.95	9.3	-0.666667	-11.05	24	64.6
	3	50	8.36667	3.06667	13.5333	11.4	7.4	1.16667	11.3333	51.3	12.7333	33.8	17.5333	22.7	29.0667	8.53333	42.9833	1.1	16.3667	-1.28333	10.0833	25.55
	4	51.1333	0.2	32.7333	1.6	13.1667	8.1	25.4667	32.6667	36.4667	31.6333	21.4333	44.7667	35.8333	23.2	8.16667	7.61667	-2.08333	16.1	0	4.36667	0.3
	5	48.2	4.66667	54.7333	3.86667	37.8333	13.5	31.6667	56.4667	21.7	30.3667	33.4667	26.0333	29	16.75	26.45	10.3167	14.05	15.4167	28.2	55.7333	45.35
	6	28.5667	11.1333	59.5	30.9667	38.0667	7.73333	18.4	59.9333	20.0333	34.8	5.5	41.0333	28.6	7.98333	26.2333	7.93333	2.4	0	1.7	18.5	29.4833
	Panel C
		YFP	YFP	YFP	YFP	YFP	YFP	YFP	YFP	YFP	YFP	YFP	YFP	YFP	YFP	YFP	YFP	YFP	YFP	YFP	YFP	YFP	YFP
	A	81.7667	0.4	4.7	14.0667	51.6333	24.5333	12.8	65.9	17.6667	6.86667	42.2167	6.18333	26.4667	25.3	20.8167	18.6167	25.55	20.3667	20.6	23.0833	35.35	45.5667
	C	26.0333	1.4	7.2	7.23333	15.6333	17.9	32.9	43.7667	20.2	6.08333	12.4833	28.7	6.36667	10.8333	17.5667	-4	6.5	25.5833	8.33333	22.8833	4.85	27.1
		NpHR	NpHR	NpHR	NpHR	NpHR	NpHR	NpHR	NpHR	NpHR	NpHR	NpHR	NpHR	NpHR	NpHR	NpHR	NpHR	NpHR	NpHR	NpHR	NpHR	NpHR
	A	16.5333	63.1	-1.6	49.6667	4.23333	0	64.6333	24.4333	-4.66667	8.11667	3.6	26.8833	28.3	5.73333	6.56667	43.5333	10.2833	18.1	7.61667	24.8833	12.8667
	C	30.8	32.3	34.1667	36.2667	14.6333	24.2667	-0.0333333	52	36.0833	15.5833	39.8833	24.25	10.9167	4.13333	18.35	19.0833	11.9667	14.4333	38.6167	17.8833	7.15
	Panel D
		YFP	YFP	YFP	YFP	YFP	YFP	YFP	YFP	YFP	YFP	YFP	YFP	YFP	YFP	YFP	YFP	YFP	YFP	YFP	YFP	YFP	YFP
	A	81.7667	0.4	4.7	14.0667	51.6333	24.5333	12.8	65.9	17.6667	6.86667	42.2167	6.18333	26.4667	25.3	20.8167	18.6167	25.55	20.3667	20.6	23.0833	35.35	45.5667
	C	26.0333	1.4	7.2	7.23333	15.6333	17.9	32.9	43.7667	20.2	6.08333	12.4833	28.7	6.36667	10.8333	17.5667	-4	6.5	25.5833	8.33333	22.8833	4.85	27.1
		NpHR	NpHR	NpHR	NpHR	NpHR	NpHR	NpHR	NpHR	NpHR	NpHR	NpHR	NpHR	NpHR	NpHR	NpHR	NpHR	NpHR	NpHR	NpHR	NpHR	NpHR
	A	16.5333	63.1	-1.6	49.6667	4.23333	0	64.6333	24.4333	-4.66667	8.11667	3.6	26.8833	28.3	5.73333	6.56667	43.5333	10.2833	18.1	7.61667	24.8833	12.8667
	C	30.8	32.3	34.1667	36.2667	14.6333	24.2667	-0.0333333	52	36.0833	15.5833	39.8833	24.25	10.9167	4.13333	18.35	19.0833	11.9667	14.4333	38.6167	17.8833	7.15
