# Supplementary material for: Responding to preconditioned cues is devaluation sensitive and requires orbitofrontal cortex during cue-cue learning
Source: eLife. 2020 Aug 24;9:e59998. doi: 10.7554/eLife.59998 (PMC7481003; doi:10.7554/eLife.59998)
Supplement: Figure 3—source data 1. [file elife-59998-fig3-data1.xlsx]

## Sheet: Figure 3
	Panel A
	Trial block	Paired	Paired	Paired	Paired	Paired	Paired
	1	1.1	14.1	5.4	0.9	4.2	14.9
	2	0.9	20.2	4.9	6.2	0	5.3
	3	0.3	2.7	0.8	0	7.7	28.4
	Trial block	Unpaired	Unpaired	Unpaired	Unpaired	Unpaired	Unpaired	Unpaired
	1	10.8	50.2	0	39.7	26	28.2	10
	2	0	9.3	4.1	17.5	3	5	1.5
	3	0	9.6	0	6.1	1.4	7.9	15.1
	Panel B
	Paired	1.1	14.1	5.4	0.9	4.2	14.9
	Unpaired	10.8	50.2	0	39.7	26	28.2	10
	Panel C
	Paired	0.1	0	0	0.7	0.1	0
	Unpaired	2.2	5.6	4.3	10	5.3	3.3	6.8
